# Supplementary material for: Compliance with Medication amongst Persons with Diabetes Mellitus during the COVID-19 Pandemic, Kerala, India: A Cross Sectional Study
Source: MDPI journal article supplement (doi:10.3390/tropicalmed7060104), 2022-06-14
Supplement: s1 [file s1]

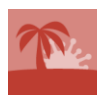

# Supplementary Material: Factors Associated with Poor Medication Compliance in Persons with Diabetes Mellitus Attending Primary Health Care Facilities, Kerala, India, 2021

Ajan Maheswaran Jaya <sup>1,\*</sup>, Anthony D. Harries <sup>2,3</sup>, Anisur Rahman <sup>4</sup>, Mohammed Khogali <sup>5</sup>, Palanivel Chinnakali <sup>6</sup> and Bipin Gopal <sup>1</sup>

**Table S1.** Factors associated with poor medication compliance in persons with diabetes mellitus attending primary health care facilities, Kerala, India, 2021.

| Category                    | Variables                  | Total      | Poor Medication Compliance |             | Crude Prevalence Ratio (95% CI) | Adjusted Prevalence Ratio (95% CI) | p Value     |
|-----------------------------|----------------------------|------------|----------------------------|-------------|---------------------------------|------------------------------------|-------------|
|                             |                            |            | n                          | (%)         |                                 |                                    |             |
|                             | <b>Total</b>               | <b>560</b> | <b>209</b>                 | <b>(37)</b> |                                 |                                    |             |
| Age group years             | 19–45                      | 65         | 30                         | (46)        | 1.31 (0.98, 1.76)               | <b>1.43 (1.07, 1.93)</b>           | <b>0.02</b> |
|                             | 46–69                      | 404        | 142                        | (35)        | Ref                             |                                    |             |
|                             | ≥ 70                       | 91         | 37                         | (41)        | 1.15 (0.87, 1.53)               | 0.99 (0.77, 1.28)                  | 0.97        |
| Gender                      | Male                       | 228        | 81                         | (36)        | Ref                             |                                    |             |
|                             | Female                     | 332        | 128                        | (39)        | 1.09 (0.87, 1.35)               |                                    |             |
| Education                   | No formal schooling        | 42         | 18                         | (43)        | 1.17 (0.81, 1.70)               |                                    |             |
|                             | School                     | 426        | 156                        | (37)        | Ref                             |                                    |             |
|                             | University                 | 92         | 35                         | (38)        | 1.04 (0.78, 1.39)               |                                    |             |
| Occupation                  | Unemployed                 | 322        | 134                        | (42)        | 1.57 (1.10, 2.24)               | 1.32 (.95, 1.86)                   | 0.26        |
|                             | Manual labourers           | 98         | 26                         | (27)        | Ref                             |                                    |             |
|                             | Others                     | 140        | 49                         | (35)        | 1.15 (0.89, 1.97)               | 1.16 (0.81, 1.65)                  | 0.42        |
| Socio-economic              | Below poverty line         | 351        | 72                         | (21)        | Ref                             |                                    |             |
|                             | Above poverty line         | 209        | 137                        | (66)        | 3.20 (2.54, 4.02)               | 1.04 (0.85, 1.18)                  | 0.68        |
| Marital status              | Married                    | 540        | 200                        | (37)        | Ref                             |                                    |             |
|                             | Single                     | 20         | 9                          | (45)        | 1.21 (0.73, 1.99)               |                                    |             |
| Comorbidities               | Hypertension—Yes           | 264        | 103                        | (39)        | 1.09 (0.88, 1.35)               |                                    |             |
|                             | Hypertension—No            | 296        | 106                        | (36)        | Ref                             |                                    |             |
|                             | Coronary heart disease—Yes | 58         | 22                         | (38)        | 1.01 (72, 1.44)                 |                                    |             |
|                             | Coronary heart disease—No  | 502        | 187                        | (37)        | Ref                             |                                    |             |
|                             | Dyslipidaemia—Yes          | 216        | 77                         | (36)        | Ref                             |                                    |             |
|                             | Dyslipidaemia—No           | 344        | 132                        | (38)        | 1.08 (0.86, 1.35)               |                                    |             |
|                             | Thyroid disease—Yes        | 59         | 26                         | (44)        | 1.21 (0.89, 1.65)               |                                    |             |
|                             | Thyroids disease—No        | 501        | 183                        | (37)        | Ref                             |                                    |             |
| Number of comorbidities     | None                       | 188        | 69                         | (37)        | 1.09 (0.86, 1.38)               |                                    |             |
|                             | 1 to 2                     | 350        | 118                        | (34)        | Ref                             |                                    |             |
|                             | > 2                        | 55         | 22                         | (40)        | 1.19 (0.83, 1.69)               |                                    |             |
| Smoking status              | Non-smoker                 | 528        | 198                        | (38)        | 1.19 (0.61, 2.32)               |                                    |             |
|                             | Current                    | 13         | 5                          | (39)        | 1.22 (0.47, 3.16)               |                                    |             |
|                             | Past smoker                | 19         | 6                          | (32)        | Ref                             |                                    |             |
| Alcohol use                 | In last 12 months—Yes      | 60         | 17                         | (28)        | Ref                             |                                    |             |
|                             | In last 12 months—No       | 500        | 192                        | (38)        | 1.35 (0.89, 2.06)               | 0.97 (0.66, 1.43)                  | 0.87        |
| Smokeless tobacco           | In last 1 month—Yes        | 22         | 9                          | (41)        | 1.1 (0.66, 1.84)                |                                    |             |
|                             | In last 1 month—No         | 538        | 200                        | (37)        | Ref                             |                                    |             |
| Family History of DM        | Yes                        | 186        | 67                         | (36)        | 1.05 (0.84, 1.33)               |                                    |             |
|                             | No                         | 374        | 142                        | (38)        | Ref                             |                                    |             |
| Location of health facility | Urban                      | 276        | 97                         | (35)        | Ref                             |                                    |             |

|                                             |                           |     |     |      |                   |                   |        |
|---------------------------------------------|---------------------------|-----|-----|------|-------------------|-------------------|--------|
|                                             | Rural                     | 284 | 112 | (39) | 1.12 (0.91, 1.39) |                   |        |
| Duration of DM since diagnosis in years     | < 2                       | 41  | 17  | (42) | 1.12 (0.76, 1.66) |                   |        |
|                                             | 2–5                       | 194 | 72  | (37) | 1.01 (0.80, 1.27) |                   |        |
|                                             | ≥ 6                       | 325 | 120 | (37) | Ref               |                   |        |
| Duration of DM treatment in years           | < 2                       | 49  | 21  | (43) | 1.13 (0.79, 1.64) |                   |        |
|                                             | 2–5                       | 202 | 76  | (38) | Ref               |                   |        |
|                                             | ≥ 6                       | 309 | 120 | (39) | 1.1 (0.78, 1.57)  |                   |        |
| Type of DM treatment                        | Oral medication single    | 142 | 70  | (49) | 1.65 (1.04, 2.65) | 1.45 (0.98, 2.14) | 0.06   |
|                                             | Oral medication multiple  | 232 | 82  | (35) | 1.18 (0.74, 1.90) | 1.25 (0.85, 1.84) | 0.26   |
|                                             | Oral medication + insulin | 139 | 43  | (31) | 1.04 (0.62, 1.72) | 1.17 (0.78, 1.76) | 0.44   |
|                                             | Insulin only              | 47  | 14  | (30) | Ref               |                   |        |
| Place of purchase of medicines              | Government                | 507 | 178 | (35) | Ref               |                   |        |
|                                             | Private                   | 9   | 5   | (56) | 1.29 (0.67, 2.49) | 1.33 (0.84, 2.14) | 0.32   |
|                                             | Government/Private        | 44  | 26  | (59) | 1.68 (1.28, 2.20) | 1.13 (0.88, 1.47) | 0.23   |
| Did health worker explain                   | How to take medicines—    |     |     |      |                   |                   |        |
|                                             | Yes                       | 521 | 190 | (37) | Ref               |                   |        |
| Did health worker explain                   | How to take medicines—No  | 39  | 19  | (49) | 1.34 (0.95, 1.88) | 0.92 (0.66, 1.28) | 0.63   |
|                                             | Regular medicine—Yes      | 306 | 108 | (35) | Ref               |                   |        |
|                                             | Regular medicine—No       | 254 | 101 | (40) | 1.12 (0.90, 1.34) |                   |        |
| Glycemic control † (n = 531)                | Good                      | 169 | 68  | (40) | 1.13 (0.90, 1.43) |                   |        |
|                                             | Poor                      | 362 | 128 | (35) | Ref               |                   |        |
| Frequency of blood glucose tests            | Once a month              | 450 | 159 | (35) | 1.02 (0.69, 1.51) | 1.25 (.84, 1.85)  | 0.27   |
|                                             | Once in 2 months          | 52  | 18  | (35) | Ref               |                   |        |
|                                             | More than 2 months        | 58  | 32  | (55) | 1.59 (1.03, 2.47) | 1.14 (0.74, 1.73) | 0.56   |
| Frequency of visits to PHC                  | Once a month              | 503 | 177 | (35) | 1.01 (0.57, 1.79) | 0.84 (0.50, 1.42) | 0.52   |
|                                             | Once in 2 months          | 23  | 8   | (35) | Ref               |                   |        |
|                                             | More than 2 months        | 34  | 24  | (71) | 2.03 (1.11, 3.70) | 0.96 (0.54, 1.69) | 0.89   |
| <b>Questions to Patients about DM</b>       |                           |     |     |      |                   |                   |        |
| DM a chronic disorder                       | Yes                       | 489 | 180 | (37) | Ref               |                   |        |
|                                             | No                        | 71  | 29  | (41) | 1.11 (0.82, 1.5)  |                   |        |
| Blood glucose control                       | Important—Yes             | 509 | 183 | (36) | Ref               |                   |        |
|                                             | Important—No              | 51  | 26  | (51) | 1.42 (1.06, 1.90) | 1.08 (0.80, 1.48) | 0.61   |
| Blood glucose level targets                 | Do you know them—Yes      | 227 | 86  | (38) | 1.03 (0.82, 1.28) |                   |        |
|                                             | Do you know them—No       | 333 | 123 | (37) | Ref               |                   |        |
| Hypoglycemia symptoms                       | Do you know them—Yes      | 386 | 141 | (37) | Ref               |                   |        |
|                                             | Do you know them—No       | 174 | 68  | (39) | 1.07 (0.85, 1.34) |                   |        |
| Hypoglycemia management                     | Do you know—Yes           | 429 | 155 | (36) | Ref               |                   |        |
|                                             | Do you know—No            | 131 | 54  | (41) | 1.14 (0.90, 1.45) |                   |        |
| Can you control blood glucose levels        | Yes                       | 175 | 58  | (33) | Ref               |                   |        |
|                                             | Partially                 | 368 | 141 | (38) | 1.15 (0.9, 1.5)   | 0.87 (0.69, 1.11) | 0.26   |
|                                             | No                        | 17  | 10  | (59) | 1.77 (1.13, 2.78) | 1.11 (0.69, 1.78) | 0.66   |
| <b>Questions to Patients about COVID-19</b> |                           |     |     |      |                   |                   |        |
| Was blood glucose tested                    | During the pandemic—Yes   | 447 | 109 | (24) | Ref               |                   |        |
|                                             | During the pandemic—No    | 113 | 100 | (89) | 3.63 (3.04, 4.33) | 3.55 (2.94, 4.31) | <0.001 |
| Have you had COVID-19                       | Yes                       | 68  | 20  | (29) | Ref               |                   |        |
|                                             | No                        | 492 | 189 | (38) | 1.31 (0.89, 1.92) | 1.40 (1.02, 1.91) | 0.03   |
| Have you had COVID-19 vaccination           | Did not receive vaccine   | 55  | 20  | (36) | Ref               |                   |        |
|                                             | One dose                  | 168 | 71  | (42) | 1.16 (0.79, 1.72) | 1.51 (1.09, 2.08) | 0.012  |
|                                             | Two doses                 | 337 | 118 | (35) | 0.96 (0.66, 1.44) | 1.44 (1.05, 1.98) | 0.024  |

Footnotes: DM = diabetes mellitus; HCW = health care workers; \**p* value from multivariable regression analysis (modified Poisson model). Variables which had *p* value < 0.2 in the unadjusted analysis were included in the multivariable model. † Good glycemic control: fasting blood glucose of 80–130 mg/dL or Postprandial blood glucose < 180 mg/dL; Poor glycemic control: fasting blood glucose of > 130 mg/dL or Postprandial blood glucose > 180 mg/dL; † 29 missing values.
